# Supplementary material
Source: MDPI journal article supplement (https://www.mdpi.com/2073-4344/12/6/656)
Supplement: s1 [file s1]

*Electronic Supplementary Information for*

**Iridium(triNHC)-Catalyzed Sustainable Transfer Hydrogenation of Glycerol Carbonate  
without Exogeneous Reductants**

Yeon-Joo Cheong,<sup>a</sup> Mi-Hyun Lee,<sup>a</sup> Heemin Byeon,<sup>a</sup> Jiyong Park,<sup>a</sup> Sungju Yu,<sup>a</sup> and Hye-Young Jang<sup>a,\*</sup>

<sup>a</sup> *Department of Energy Systems Research, Ajou University, Suwon 16499, Korea*

E-mail address of corresponding authors: [hyjang2@ajou.ac.kr](mailto:hyjang2@ajou.ac.kr)

|       |                                                                                 |     |
|-------|---------------------------------------------------------------------------------|-----|
| I.    | Experimental Procedures.....                                                    | S2  |
| II.   | Spectral data of <b>E</b> and <b>F</b> .....                                    | S4  |
| III.  | <sup>1</sup> H NMR spectra of the reaction mixture.....                         | S10 |
| IV.   | Accumulation experiment .....                                                   | S14 |
| V.    | Transfer hydrogenation of glycerol carbonate (Table S1).....                    | S15 |
| VI.   | Mass Spectra of the reaction mixture using deuterated glycerol.....             | S16 |
| VII.  | <sup>13</sup> C NMR analysis of the mixutre of glycerol carbonate and CsOH..... | S17 |
| VIII. | <sup>1</sup> H NMR spectra of reactants and the reaction mixture .....          | S18 |

## I. Experimental Procedures

**General Procedure.** The  $[\text{Ir}(\text{COD})\text{Cl}]_2$  was used as received from Strem chemicals, Inc. All commercially available reagent were obtained from Sigma Aldrich and TCI. Catalyst A, B, C and D was prepared as described in the literature procedures.<sup>1</sup> Proton nuclear magnetic resonance ( $^1\text{H}$  NMR) spectra were recorded with a JEOL Resonance ECZ600R (600 MHz) spectrometer. Chemical shifts are reported in delta ( $\delta$ ) units, parts per million (ppm) relative to the center of a singlet peak at 2.50 ppm for DMSO- $d_6$ . Carbon-13 nuclear magnetic resonance ( $^{13}\text{C}$  NMR) spectra were recorded with a JEOL Resonance ECZ600R (151 MHz). Chemical shift are reported in delta ( $\delta$ ) units, parts per million (ppm) relative to the center of a multiplet peak at 39.52 ppm for DMSO- $d_6$ . High resolution mass spectra were obtained with a magnetic sector-electric sector double focusing mass analyzer equipment. Melting points of the compounds were checked in open capillary and were uncorrected. Elemental analyses were performed by Flash 2000 (Thermo Scientific).

### Synthetic Procedure for the catalyst E

1,1'-(1,4-Phenylene)bis(3-benzyl-1*H*-imidazol-3-ium) bromide (0.2 mmol, 1 equiv.) and  $\text{Ag}_2\text{O}$  (0.24 mmol, 1.2 equiv.) were dissolved in MeOH. The reaction mixture was stirred for 3 hours at room temperature. Then, the mixture was filtered with celite and filtrate was evaporated under vacuo. The residue,  $[\text{Ir}(\text{COD})\text{Cl}]_2$  (0.2 mmol, 1 equiv.) and  $\text{KPF}_6$  (0.5 mmol, 2.5 equiv.) were dissolved in MeCN. The reaction mixture was stirred for another 3 hours at room temperature under  $\text{N}_2$  atmosphere. Then, the mixture was filtered with celite and filtrate was evaporated under vacuo. The catalyst E was obtained with 30 % yield as yellow solid.

### Synthetic Procedure for the catalyst F

1-Phenyl-3-(pyridine-2-ylmethyl)-1*H*-imidazol-3-ium bromide (0.35 mmol, 1 equiv.) and  $\text{Ag}_2\text{O}$  (0.175 mmol, 0.5 equiv.) was dissolved in  $\text{CH}_2\text{Cl}_2$  (0.05 M) under  $\text{N}_2$  atmosphere. The reaction mixture was stirred for 2 hours at room temperature. Then, the mixture was filtered with celite.  $[\text{IrCp}^*\text{Cl}_2]_2$  (0.175 mmol, 0.5 equiv.) and  $\text{KPF}_6$  (0.7 mmol, 2.01 equiv.) were added to this residue and stirred for another 2 hours at room temperature under  $\text{N}_2$  atmosphere. The reaction mixture was filtered with celite and wash with  $\text{CH}_2\text{Cl}_2$ . The filtrate was evaporated and dried under vacuo. The catalyst F was obtained with 88 % yield as yellow solid.

### Catalytic procedure

The catalyst (monometallic complexes 1  $\mu\text{mol}$  and bimetallic complexes 0.5  $\mu\text{mol}$ ), glycerol carbonate (10.6 mmol),  $\text{CsOH}\cdot\text{H}_2\text{O}$  (21.2 mmol) and NMP (10 ml) were put into an autoclave. The mixture was stirred at 200  $^\circ\text{C}$  for 20 hours. Then, the reaction mixture was cooled down to ambient temperature, and diluted with  $\text{H}_2\text{O}$ . The TONs of formates and lactates were calculated by  $^1\text{H}$  NMR spectroscopy in  $\text{D}_2\text{O}$  using isonicotinic acid as an internal standard. The mole numbers of each product were calculated by comparing  $^1\text{H}$  NMR integration values of the internal standard. Then, the mole numbers of each product were divided by the mole numbers of iridium ions to afford TONs.

---

<sup>1</sup> (a) Cheong, Y.-J.; Sung, K.; Kim, J.; Kim, Y. K.; and Jang, H.-Y. *Eur. J. Inorg. Chem.* **2020**, 4064. (b) Cheong, Y.-J.; Sung, K.; Park, S.; Jung, J.; and Jang, H. -Y. *ACS Sustainable Chem. Eng.* **2020**, 8, 6972. (c) Sharninghausen, L. S.; Campos, J.; Manas, M. G.; Crabtree, R. H. *Nat Commun* **2014**, 5, 5084.

### Gas analysis

Gaseous products were analyzed using a Shimadzu Nexis GC-2030 gas chromatograph equipped with a barrier discharge ionization detector. The measurement of a gas-phase sample generated a chromatogram consisting of peaks associated with H<sub>2</sub>, air (i.e., O<sub>2</sub> and N<sub>2</sub>), and CO<sub>2</sub>. Areas of these peaks were integrated by the instrument software, followed by conversion to the moles by taking into account the calibration constant for each species. In the case of CO<sub>2</sub>, the peak contribution of CO<sub>2</sub> present in the air was removed from the total peak of CO<sub>2</sub> measured due to the reaction performed in the ambient conditions. The number of moles of product in the sampled volume for the measurement was multiplied by the ratio of the headspace volume to the sampled volume to yield the actual amount of product in the headspace.

## II. Spectral data of E and F

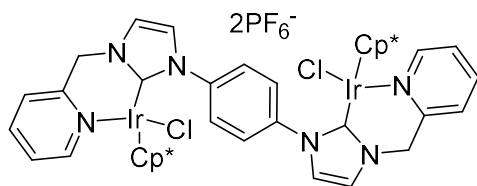

### Catalyst E

**<sup>1</sup>H NMR** (DMSO-d<sub>6</sub>, 600 MHz) δ 8.88 (d, *J* = 4.8 Hz, 2H), 8.18-8.15 (m, 6H), 7.91 (d, *J* = 2.1 Hz, 2H), 7.82 (d, *J* = 7.6 Hz, 2H), 7.70 (d, *J* = 2.1 Hz, 2H), 7.63 (t, *J* = 6.2 Hz, 2H), 5.76 (d, *J* = 15.8 Hz, 2H), 4.89 (d, *J* = 15.1 Hz, 2H), 1.40 (s, 30H)

**<sup>13</sup>C NMR** (DMSO-d<sub>6</sub>, 151 MHz) δ 157.0, 154.8, 154.4, 140.7, 139.1, 127.7, 126.7, 125.2, 125.2, 123.4, 91.0, 54.2, 8.7

**HRMS** *m/z* (FAB, [M-PF<sub>6</sub>]<sup>+</sup>) : calcd for C<sub>44</sub>H<sub>50</sub>N<sub>6</sub>Cl<sub>2</sub>Ir<sub>2</sub>PF<sub>6</sub> 1263.2375, found 1263.2377

**EA** calculated for C<sub>44</sub>H<sub>50</sub>N<sub>6</sub>Ir<sub>2</sub>Cl<sub>2</sub>P<sub>2</sub>F<sub>12</sub> (wt 1408.19) C, 37.529; H, 3.579; N, 5.968 found C, 37.2819; H, 3.7631; N, 6.6047

**Mp** decomposed at 300 °C

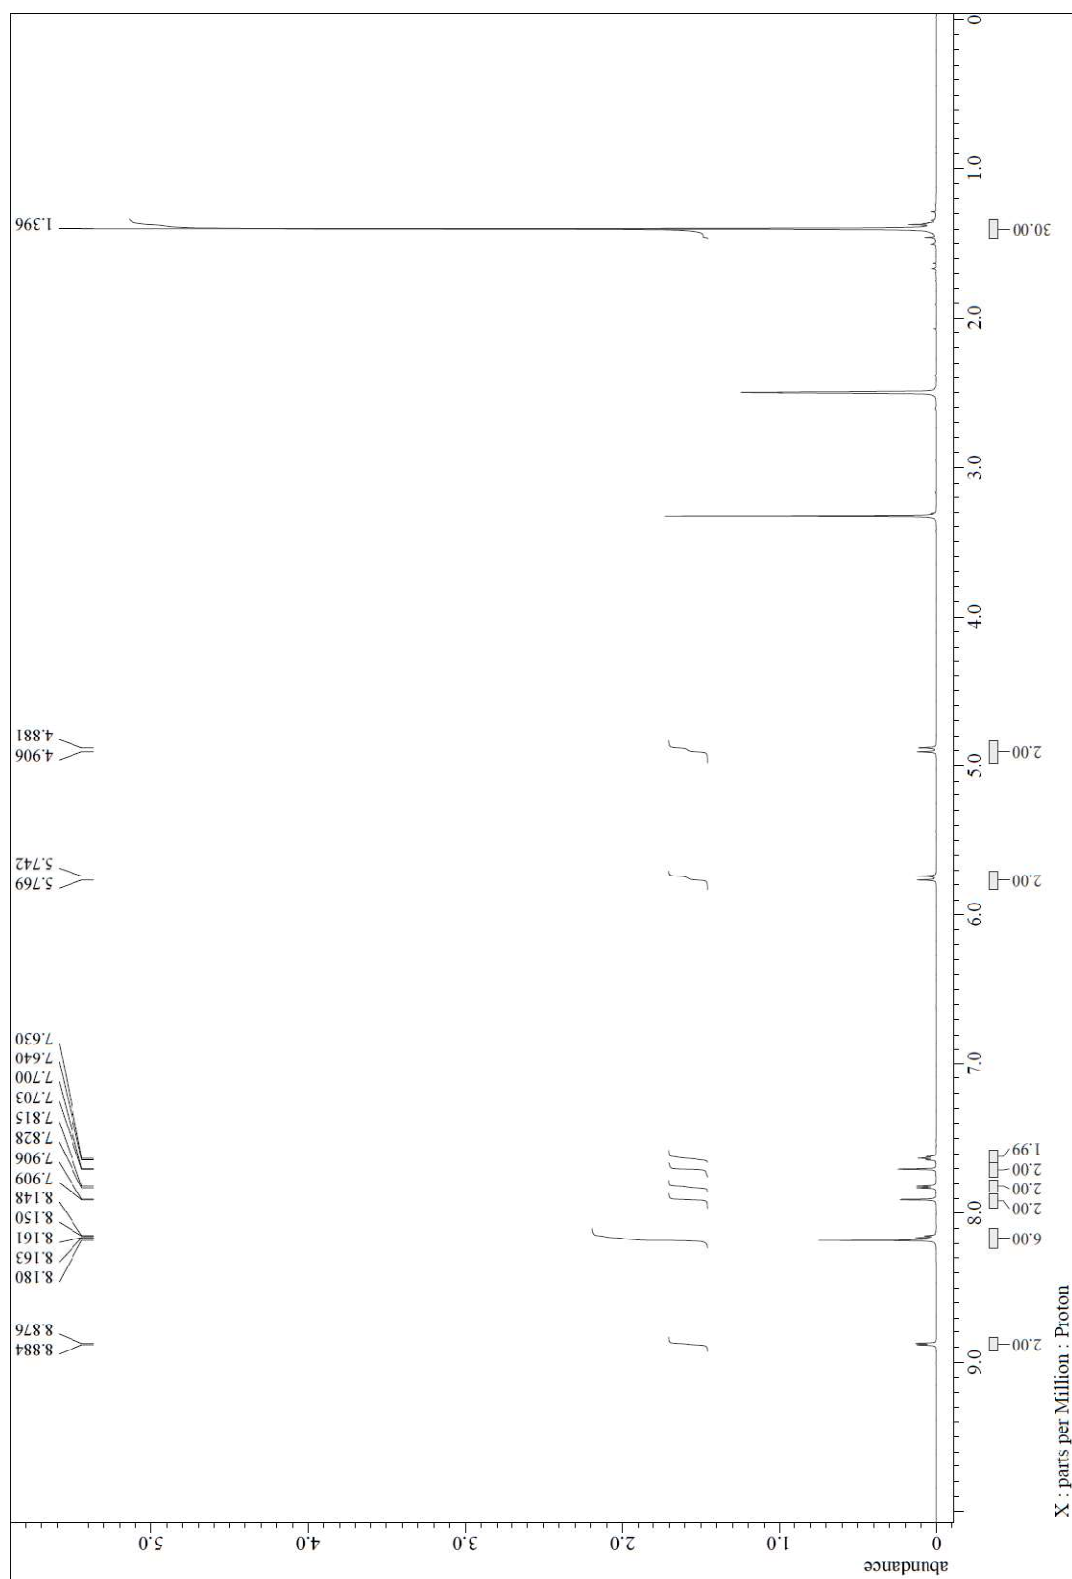

Figure S1.  $^1\text{H}$  NMR spectra of catalyst **E**

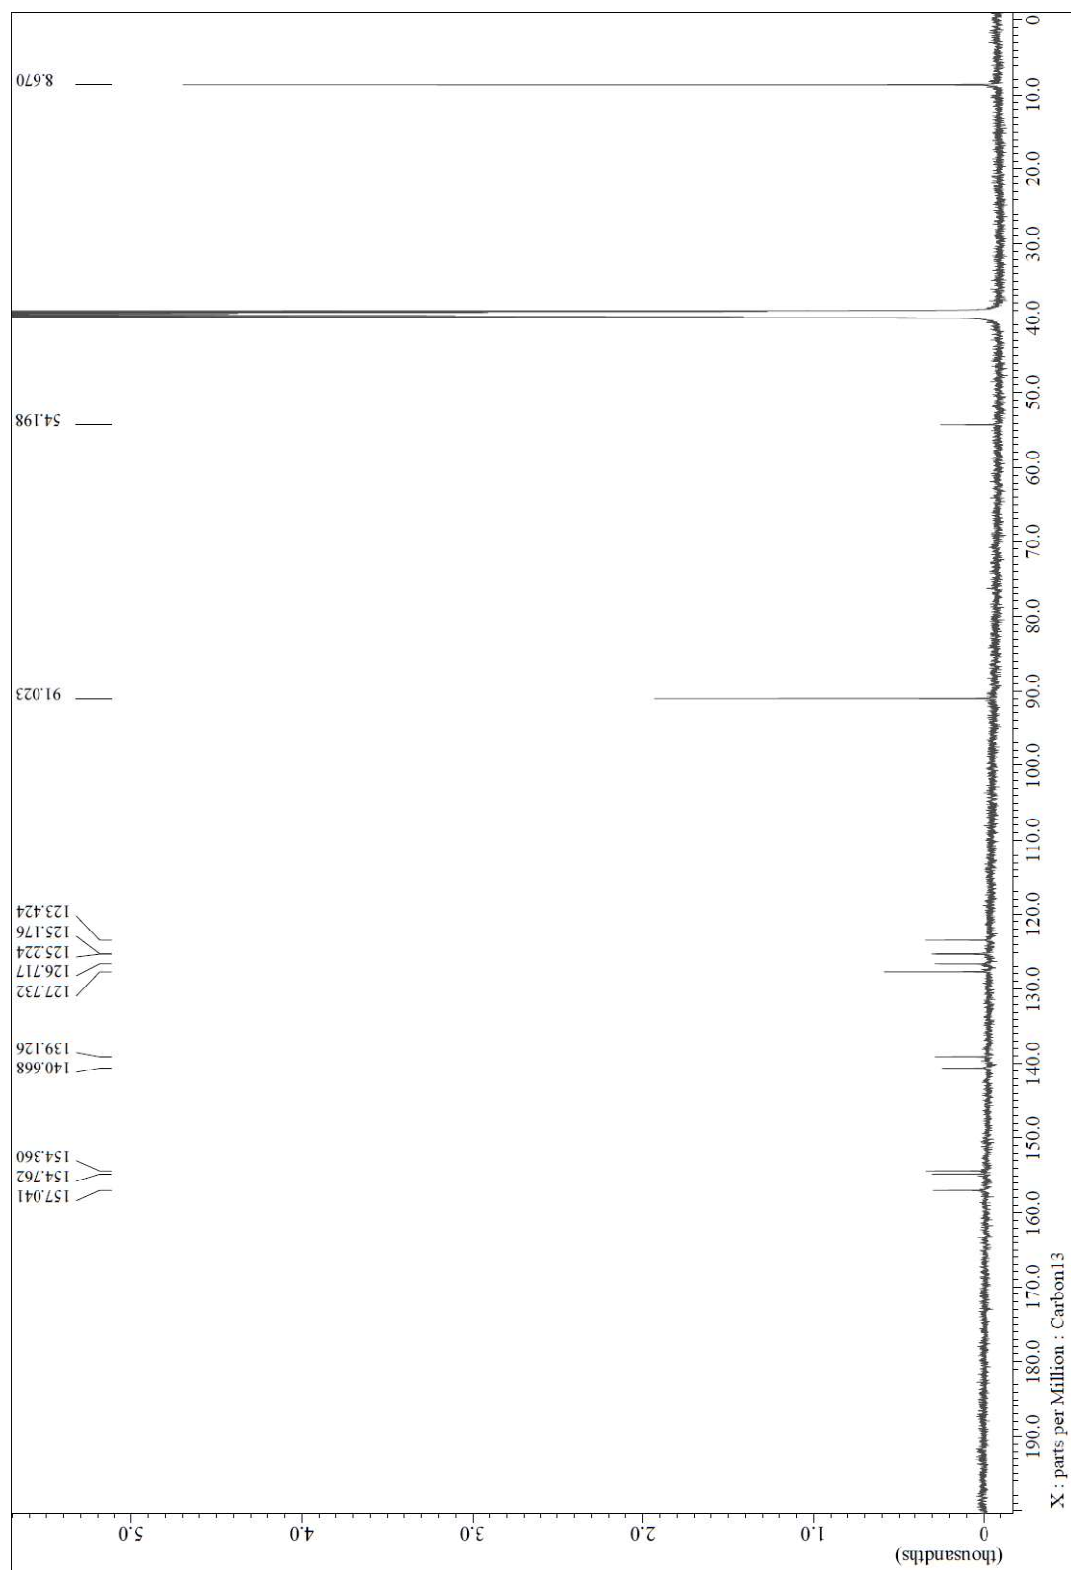

Figure S2.  $^{13}\text{C}$  NMR spectra of catalyst **E**

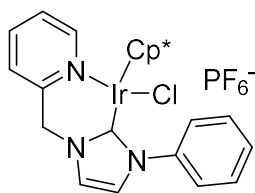

**Catalyst F**

**<sup>1</sup>H NMR** (DMSO-*d*<sub>6</sub>, 600 MHz) δ 8.88 (dd, *J* = 5.5, 1.4 Hz, 1H), 8.14 (td, *J* = 7.9, 1.5 Hz, 1H), 7.96 (m, 2H), 7.84 (d, *J* = 2.1 Hz, 1H), 7.80 (d, *J* = 7.6 Hz, 1H), 7.74 (d, *J* = 2.1 Hz, 1H), 7.62-7.60 (m, 1H), 7.57-7.53 (m, 3H), 5.72 (d, *J* = 15.8 Hz, 1H), 4.87 (d, *J* = 15.8 Hz, 1H), 1.32 (s, 15H)

**<sup>13</sup>C NMR** (DMSO-*d*<sub>6</sub>, 151 MHz) δ 157.1, 154.4, 140.5, 138.8, 129.1, 128.8, 127.7, 126.6, 125.3, 125.0, 123.0, 90.8, 54.0, 8.5

**HRMS** *m/z* (FAB, [M-PF<sub>6</sub>]<sup>+</sup>) : calcd for C<sub>25</sub>H<sub>28</sub>N<sub>3</sub>ClIr 598.1601, found 598.1604

**EA** calculated for C<sub>25</sub>H<sub>28</sub>N<sub>3</sub>IrClPF<sub>6</sub> (wt 743.152) C, 40.406; H, 3.798; N, 5.654 found C, 40.3011; H, 3.7075; N, 5.7049

**Mp** decomposed at 185 °C

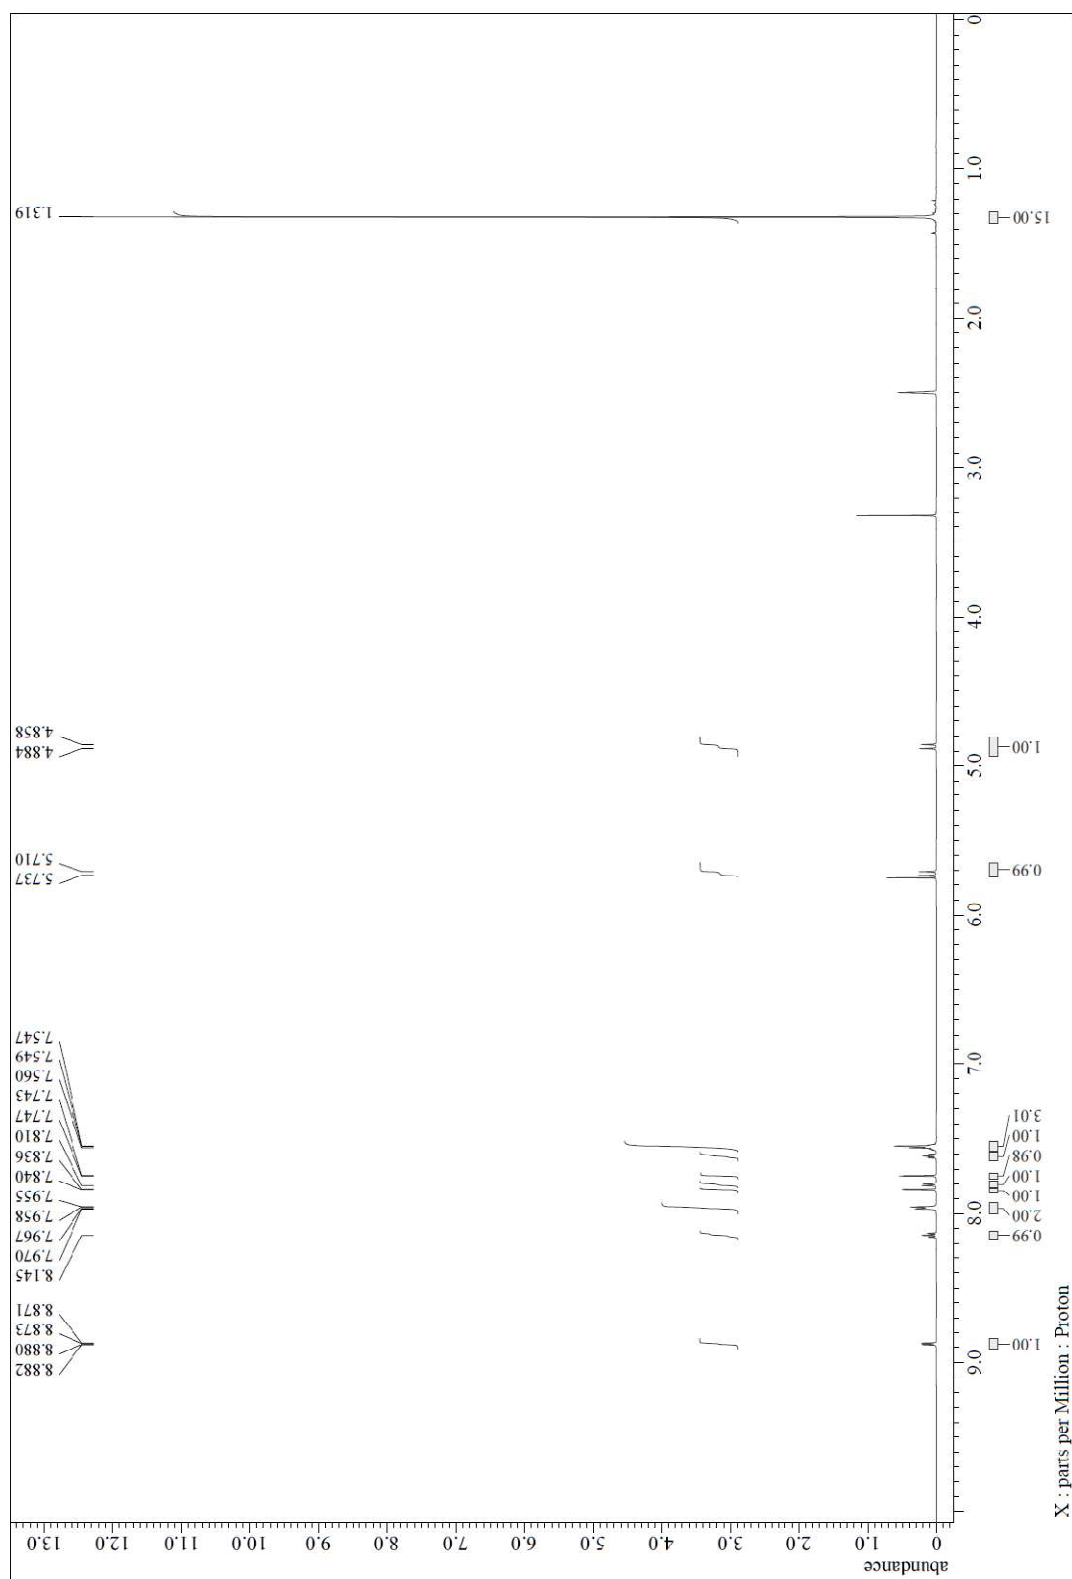

Figure S3.  $^1\text{H}$  NMR spectra of catalyst **F**



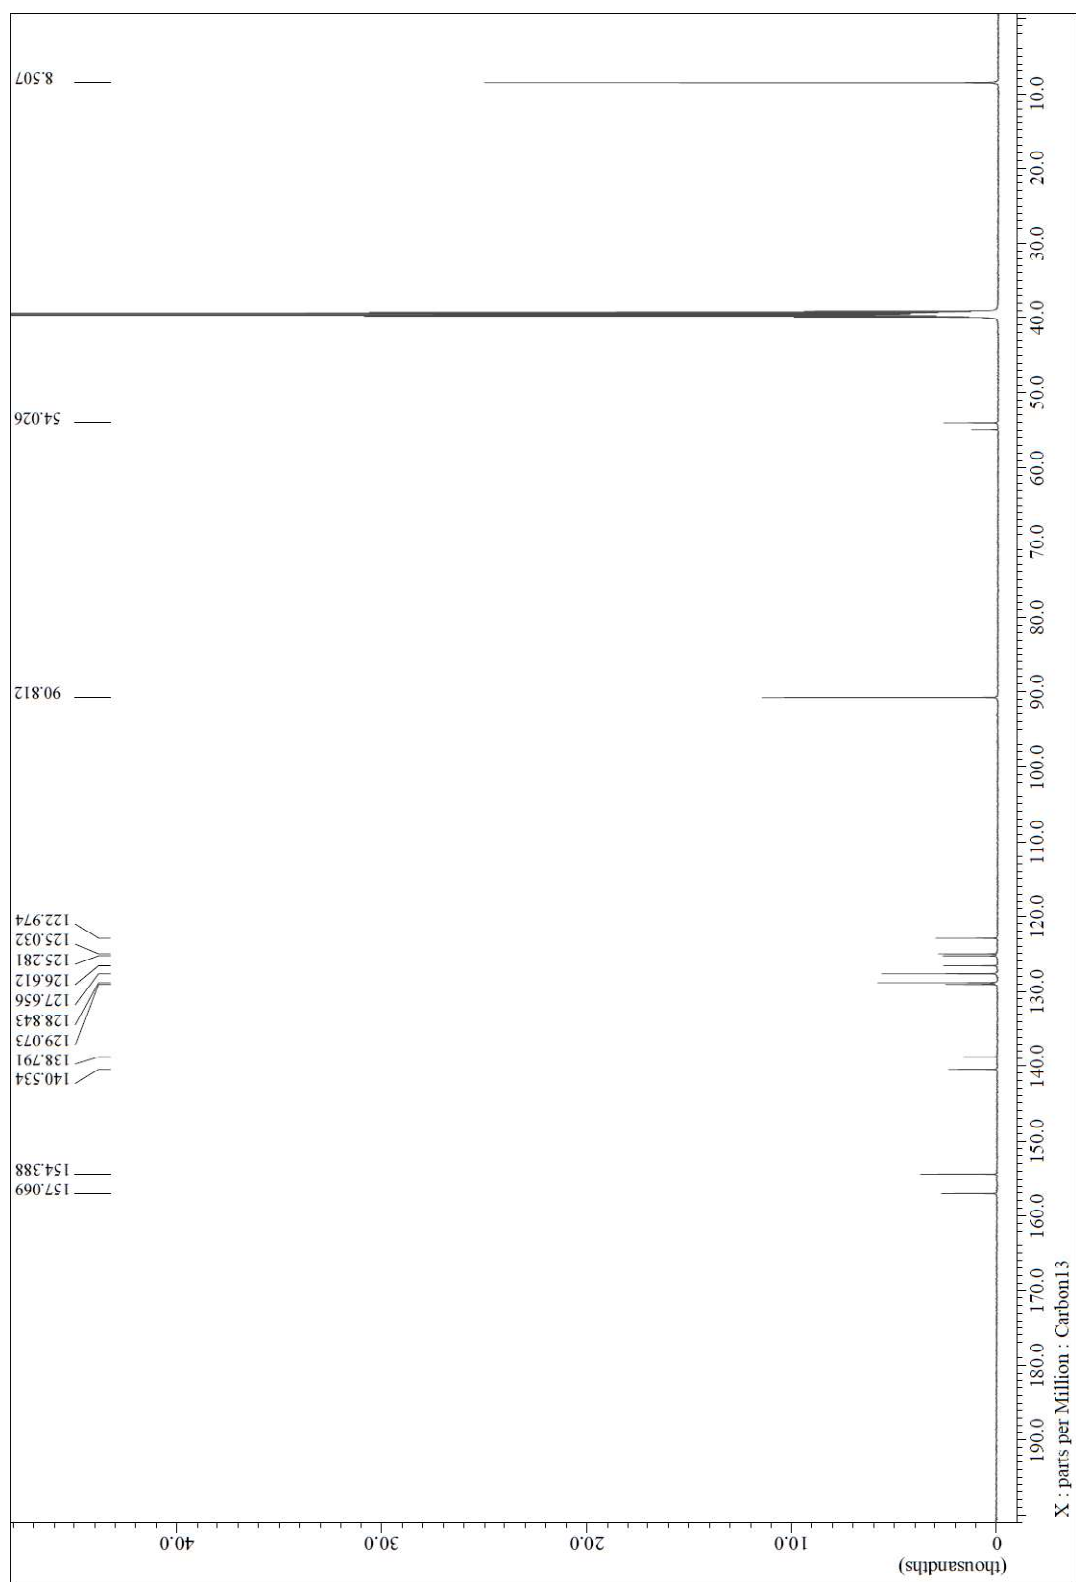

Figure S4.  $^{13}\text{C}$  NMR spectra of catalyst **F**

### III. $^1\text{H}$ NMR spectra of the reaction mixtures

Entry 2 of Table 1 (Formate  $\text{TONs}_{\text{avg}} = 3,600$ , Lactate  $\text{TONs}_{\text{avg}} = 5,300$ )

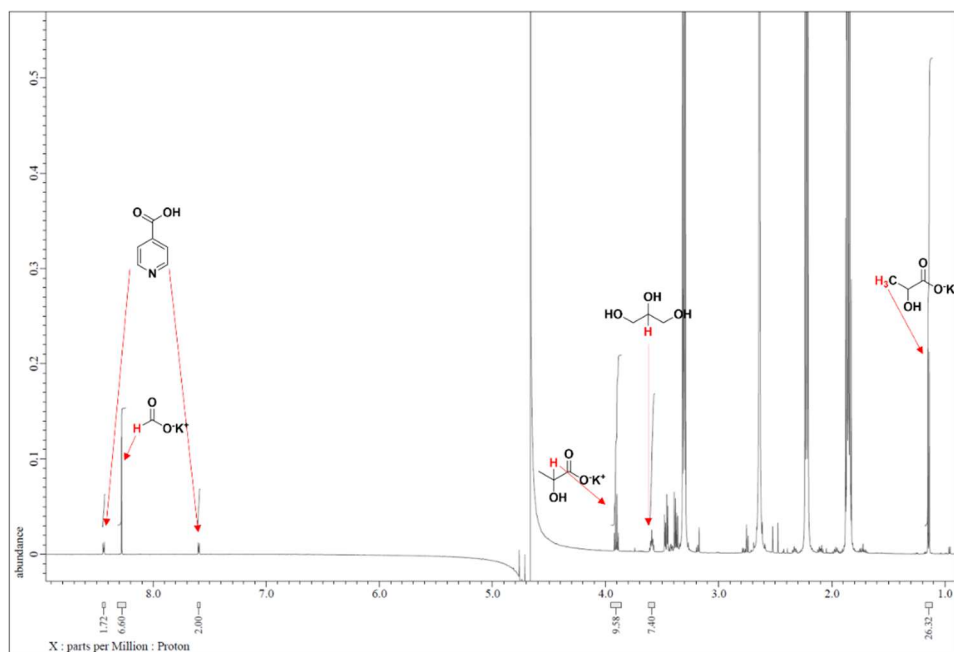

Formate  $\text{TONs} = 3,753$ , Lactate  $\text{TONs} = 5,447$

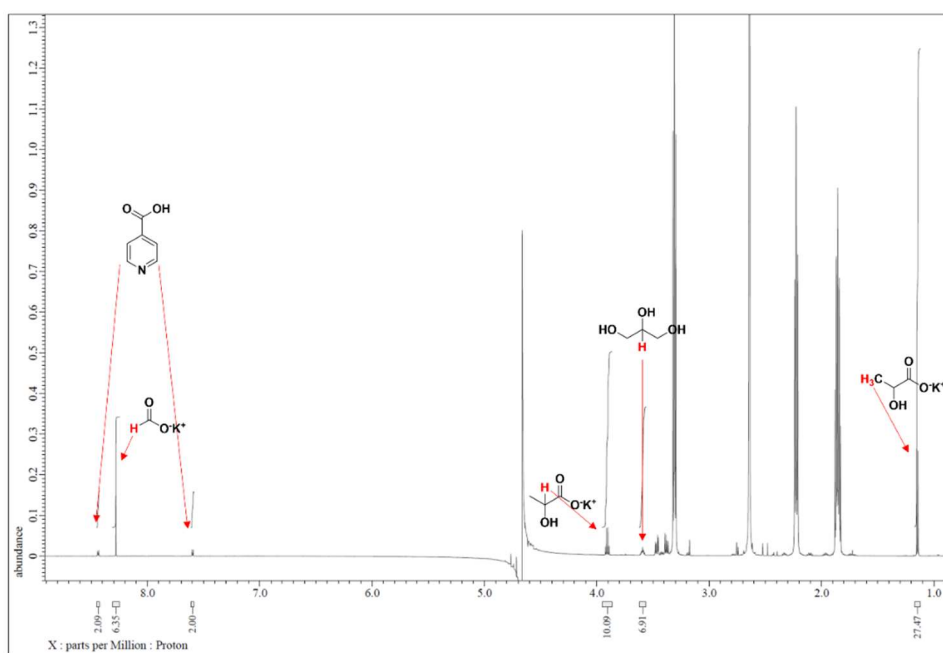

Formate  $\text{TONs} = 3,611$ , Lactate  $\text{TONs} = 5,737$

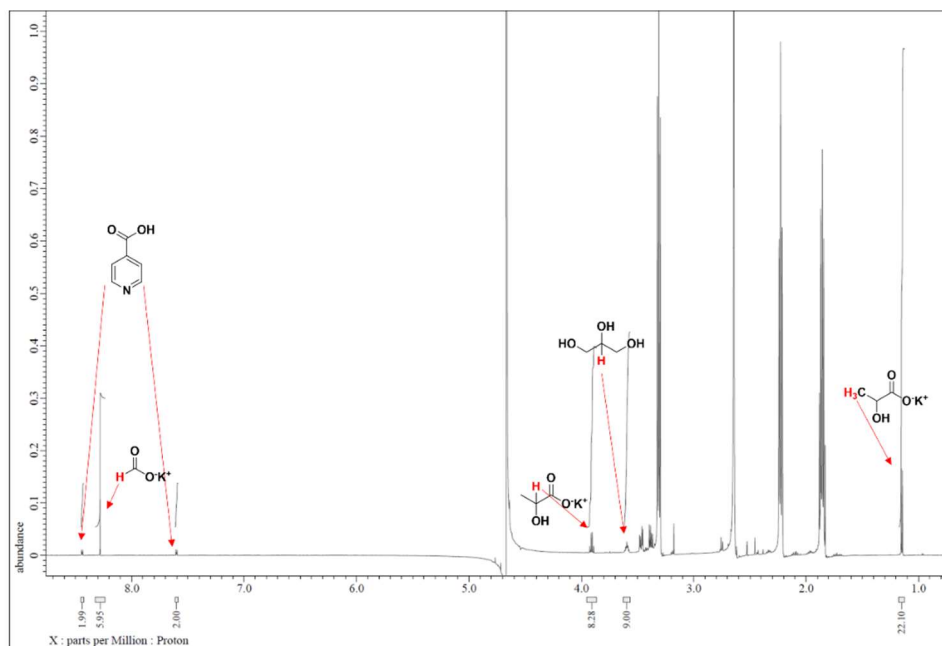

Formate TONs = 3,383, Lactate TONs = 4,708

Figure S5.  $^1\text{H}$  NMR spectra of Entry 2 (Table 1) indicating the signature peak of each species (three repeated runs)

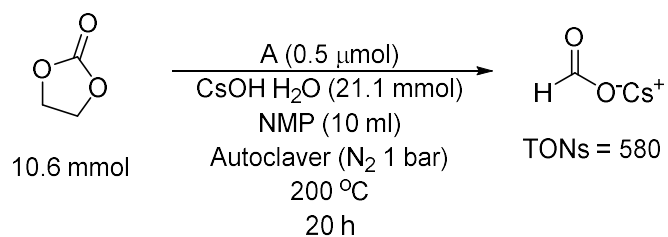

Scheme S1. The reaction of ethylene carbonate

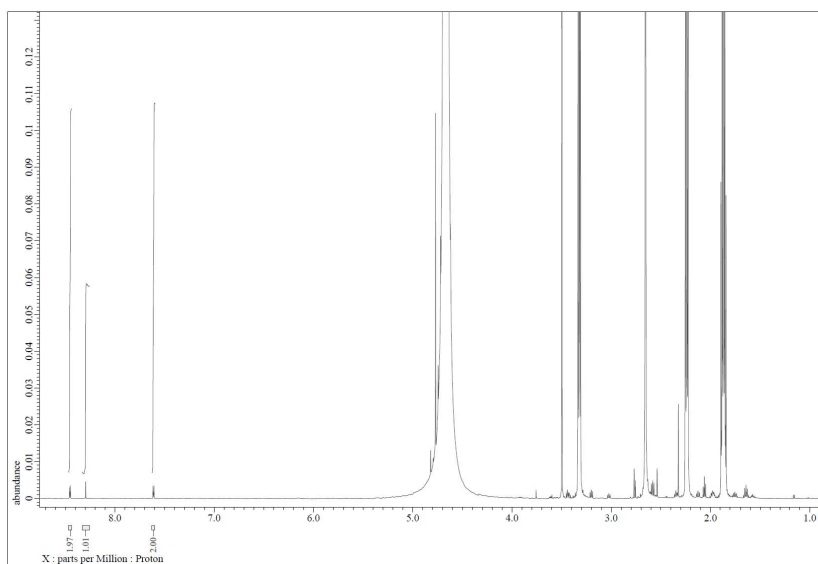

Formate TONs = 586

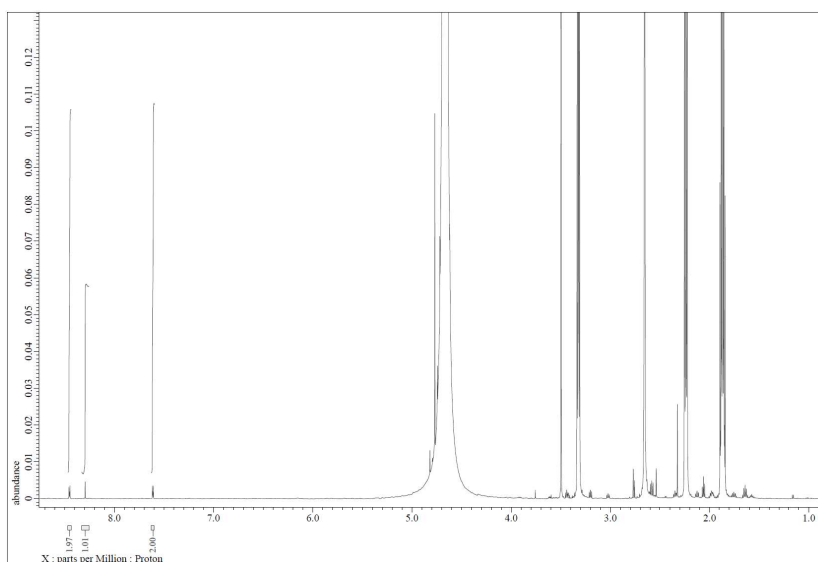

Formate TONs = 574

Figure S6. <sup>1</sup>H NMR spectra of the reaction mixture using ethylene glycol (two repeated runs)

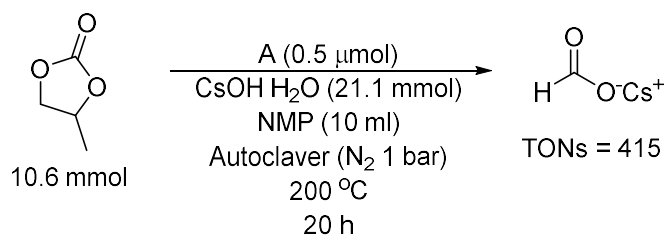

Scheme S2. The reaction of propylene carbonate

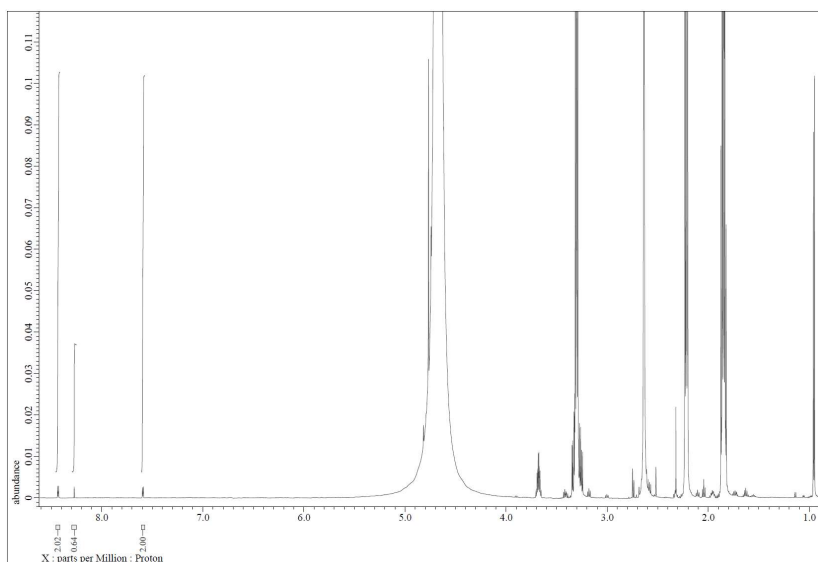

Formate TONs = 387

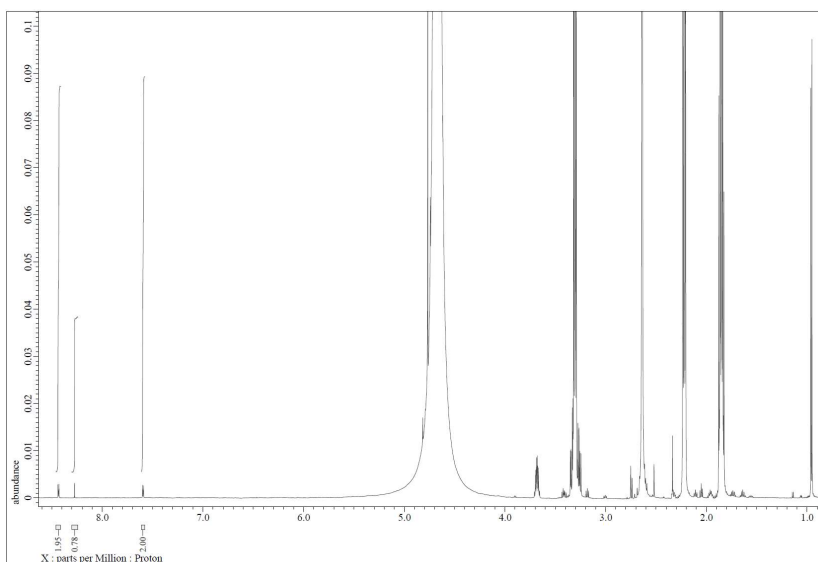

Formates TONs = 444

Figure S7. <sup>1</sup>H NMR spectra of the reaction mixture using propylene glycol (two repeated runs)

#### IV. Accumulation experiments

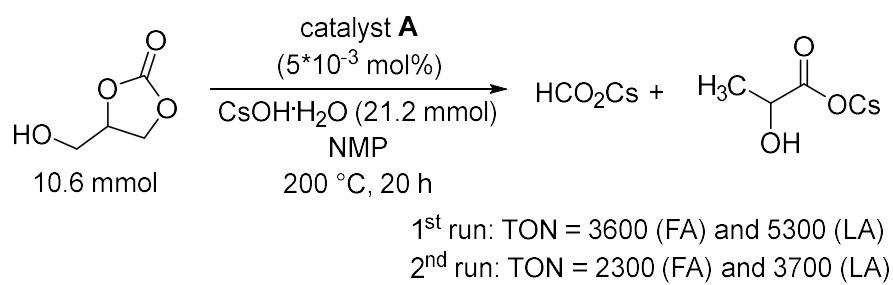

Scheme S3. Accumulation experiments of GC and OH<sup>-</sup>

## V. Data of Transfer hydrogenation of glycerol carbonate

Table S1. Transfer hydrogenation of glycerol carbonate

| entry | catalyst<br>(mol%)               | base<br>(equiv.) | solvent          | formate<br>(TON, yield) | lactate<br>(TON, yield) |
|-------|----------------------------------|------------------|------------------|-------------------------|-------------------------|
| 1     | <b>A</b> ( $2.5 \cdot 10^{-3}$ ) | CsOH (2)         | NMP              | 6,500, 31%              | 9,600, 45%              |
| 2     | <b>A</b> ( $5 \cdot 10^{-3}$ )   | CsOH (2)         | NMP              | 3,600, 34%              | 5,300, 50%              |
| 3     | <b>A</b> ( $1 \cdot 10^{-2}$ )   | CsOH (2)         | NMP              | 980, 19%                | 1,900, 35%              |
| 4     | <b>A</b> ( $5 \cdot 10^{-3}$ )   | CsOH (2)         | H <sub>2</sub> O | 21, 0.2%                | 89, 0.8%                |
| 5     | <b>A</b> ( $5 \cdot 10^{-3}$ )   | KOH (2)          | NMP              | 12, 0.1%                | 65, 0.6%                |
| 6     | <b>A</b> ( $5 \cdot 10^{-3}$ )   | NaOH (2)         | NMP              | 160, 1.5%               | 130, 1.3%               |
| 7     | <b>A</b> ( $5 \cdot 10^{-3}$ )   | CsOH (3)         | NMP              | 930, 8.8%               | 4800, 46%               |
| 8     | <b>A</b> ( $5 \cdot 10^{-3}$ )   | --               | NMP              | --                      | --                      |
| 9     | --                               | CsOH (2)         | NMP              | --                      | --                      |
| 10    | <b>B</b> ( $1 \cdot 10^{-2}$ )   | CsOH (2)         | NMP              | 2,400, 23%              | 3,600, 34%              |
| 11    | <b>B</b> ( $5 \cdot 10^{-3}$ )   | CsOH (2)         | NMP              | 5,200, 25%              | 7,400, 35%              |
| 12    | <b>C</b> ( $1 \cdot 10^{-2}$ )   | CsOH (2)         | NMP              | 2,600, 24%              | 4,200, 40%              |
| 13    | <b>D</b> ( $1 \cdot 10^{-2}$ )   | CsOH (2)         | NMP              | 2,100, 20%              | 3,400, 32%              |
| 14    | <b>E</b> ( $5 \cdot 10^{-3}$ )   | CsOH (2)         | NMP              | 580, 5.4%               | 2,400, 22%              |
| 15    | <b>F</b> ( $1 \cdot 10^{-2}$ )   | CsOH (2)         | NMP              | 310, 3.0%               | 1,700, 16%              |

The mixture of catalysts, glycerol carbonate (10.6 mmol), and base in NMP (10 mL) was heated at 200 °C for 20 h. Catalysts **A** and **E** have two iridium ions in the molecule. CsOH is a monohydrate form.

## VI. Mass spectra of the reaction mixture using deuterated glycerol

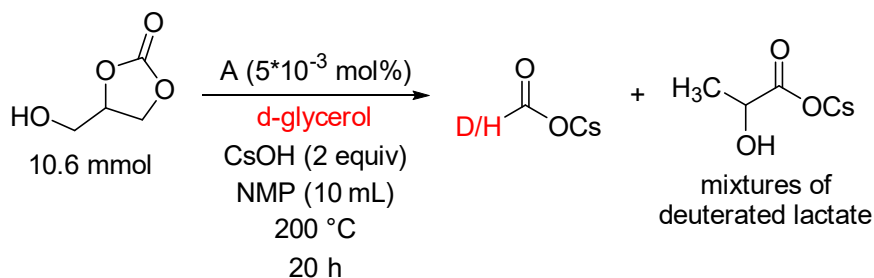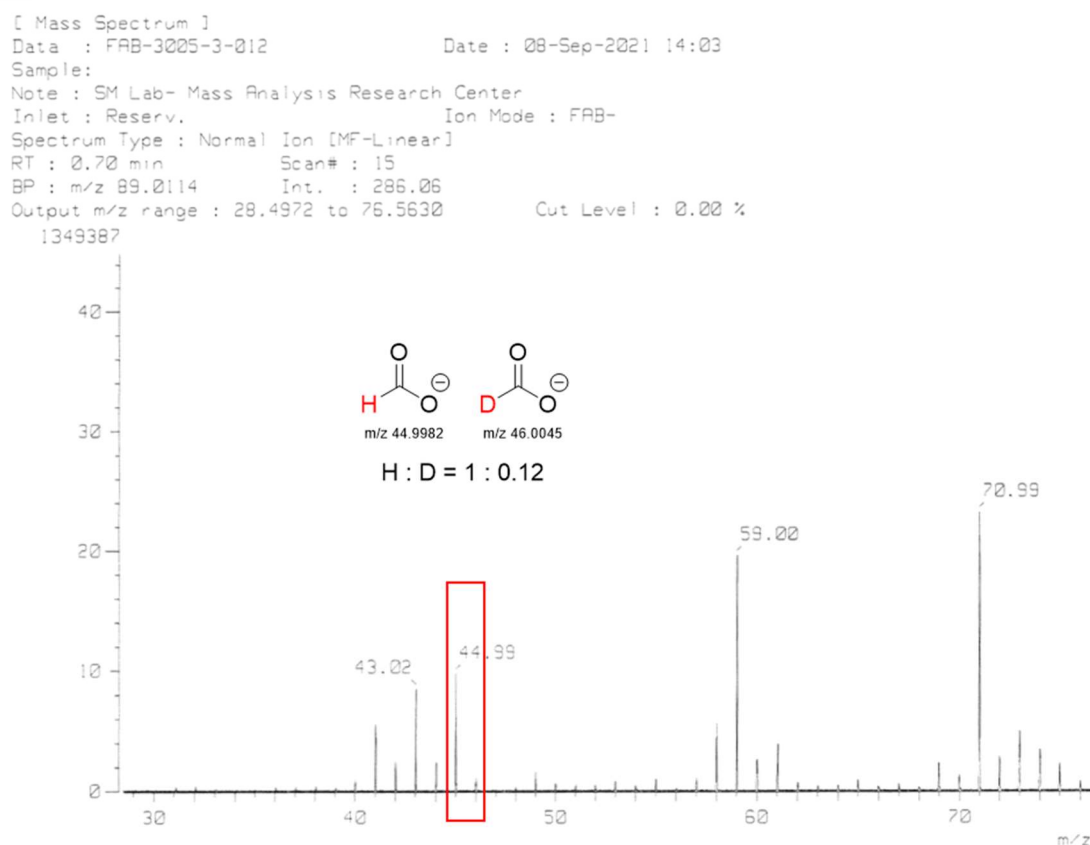

Figure S8. Mass spectrum of the reaction mixture involving *d*-glycerol



## VII. $^{13}\text{C}$ NMR analysis of the mixture of glycerol carbonate and CsOH

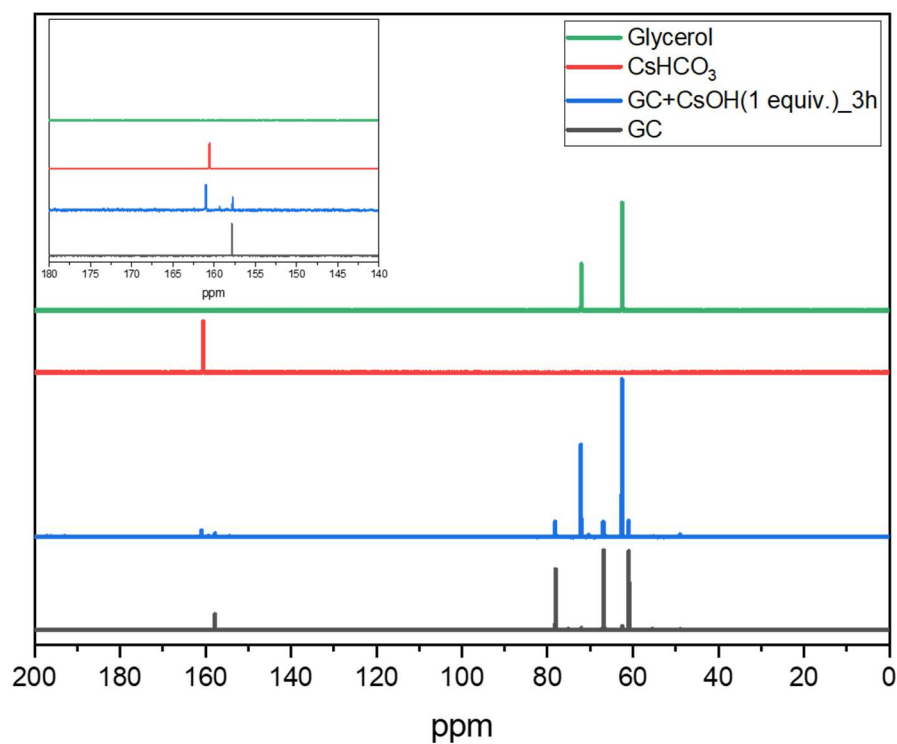

Figure S9.  $^{13}\text{C}$  NMR spectra; glycerol (green),  $\text{CsHCO}_3$  (red), the mixture of glycerol carbonate(GC) and CsOH (blue) and GC (black).

### VIII. $^1\text{H}$ NMR spectra of reactants and the reaction mixture

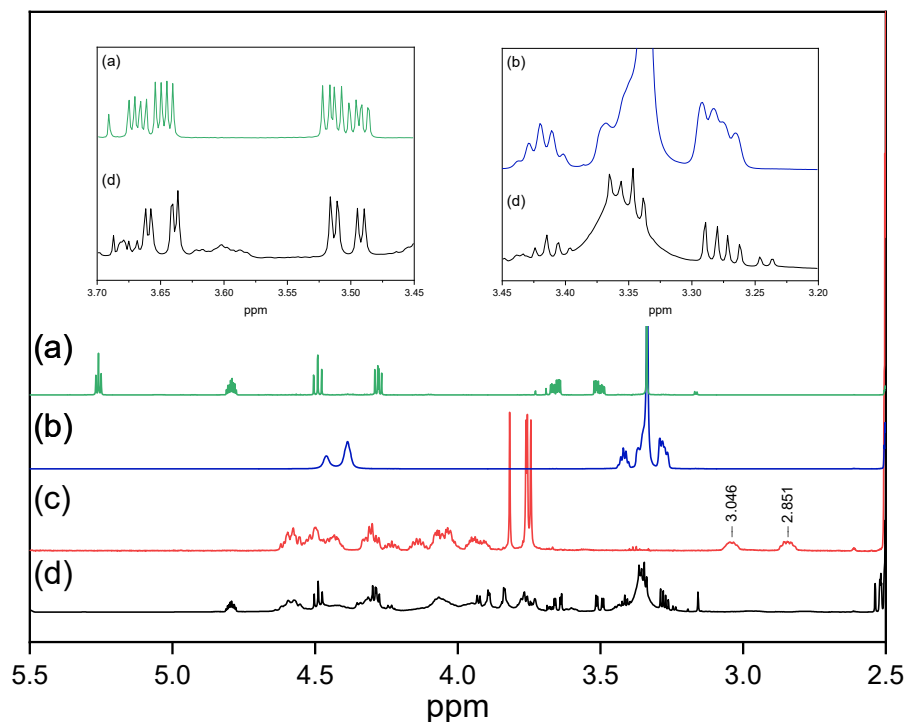

Figure S10.  $^1\text{H}$  NMR spectra in  $\text{DMSO-d}_6$ ; (a) glycerol carbonate (green), (b) glycerol (blue), (c) catalyst **A** (red), and (d) the mixture of glycerol carbonate (1 equiv),  $\text{CsOH}$  (2 equiv), catalyst **A** (0.5 equiv) (black).

*Comments:* The  $^1\text{H}$  NMR spectrum of the mixture of catalyst **A**, glycerol carbonate, and  $\text{CsOH}$  (Figure S10(d)) shows the disappearance of cyclooctadiene (COD) peaks (3.046 ppm and 2.851 ppm of  $^1\text{H}$  NMR of catalyst **A**), indicating the dissociation of COD from catalyst **A** during the reaction. Other peaks corresponding to COD are overlapped with other peaks of reactants. We also observed glycerol dissociated from glycerol carbonate in the mixture (d). However, it is challenging whether the glycerol is coordinated with iridium ions because the peak position and the splitting patterns of glycerol (b) and glycerol from the mixture (d) are similar.
